# Supplementary material for: “The Videos Made Me Feel Less Alone”: Feasible Executive Function Supports For Families
Source: Springer Nature journal article supplement (doi:10.1007/s10826-023-02768-w), 2024-01-24
Supplement: MOESM1 [file 26659790]

**Supplement A**

***Inclusionary and Exclusionary Criteria***

The screening questions regarding whether a caregiver’s child needed supports or accommodations in the classroom included examples (e.g. 504 plan, Individualized Education Plan (IEP), Student Study Team (SST)). For the question about their child having symptoms of ADHD or ASD, there was no exclusionary criteria for co-occurring diagnoses or symptoms, thus caregivers of children who demonstrated behaviors consistent with ADHD or ASD along with behaviors consistent with other diagnoses were eligible to participate. To assess whether a child’s EF challenges interfered in daily life in the home, caregivers were asked two global EF interference questions adapted from the Flexibility Interference Scale (Anthony et al., 2020) to screen both EF frequency and severity of interference at home. Caregivers who answered a 1 (never/no interference) on either of the 10-point Likert-scaled questions were ineligible to participate in the study because of the absence of EF challenges in the home. No confirmatory diagnostic procedures, such as evaluations or requests for formal clinical reports, were used to validate the caregiver-reported diagnoses or language abilities. Research staff had scripts to aid caregivers in the understanding of screening questions and any nuanced cases were discussed with the principal investigators to establish a consensus regarding participant eligibility.

***Recruitment Methods***

Caregivers were recruited through a variety of community pathways in both CO and the DMV including: school, state-, and district-wide communications, caregiver special education groups, and ASD/ADHD advocacy organizations. Some recruitment strategies included postings on school or local social media boards, email communication from school administrators to caregivers of children with school supports, and individual meetings with key community members to promote understanding and excitement for the project within the community. To recruit Spanish-English bilingual caregivers, research staff engaged Spanish-speaking caregivers’ groups and organizations in CO and the DMV.

**Supplement B**

**Supplemental Table 1**

*Video Titles and Descriptions*

| **Video Title** | **Video Description** |
| --- | --- |
| Understanding Executive Functioning | This animation introduces parents to what executive functions are and what problems with executive functioning look like. It introduces simple steps parents can take to help their children. |
| Motivation: How Everyone in Your Family Can Get More of What They Want | In this webinar, an expert explains how children and parents can both get more of what they want through motivating strategies. |
| Compromising So Everyone Wins | Compromising helps everyone get what they want. This animation explains the different types of compromise and how they can be used so that both parents and their children can walk away with something positive. |
| Is it a "Can't" or a "Won't"? | In this interview, parents Troy and Vanessa reflect on how children sometimes can’t do something when it appears that they won’t do it. They break down how to turn those can’ts into cans. |
| Managing Intense Feelings | In this animation, we cover how to identify the intensity of feelings as well as the different strategies available to manage those feelings and get your child back to feeling “on target.” |
| Preventing Overload | This animation offers parents tips on helping to prevent your child from getting overwhelmed, such as identifying possible triggers and preparing for them in advance. |
| What to do When What We Want Seems Impossible? | Sometimes what we want is not possible. This webinar features an expert explaining what to do in these situations to help your child. |
| Plan A/Plan B & Big Deal/Little Deal | Coming up with multiple plans helps to keep your child thinking flexibly and calling events a ‘big deal’ or a ‘little deal’ helps them manage disappointment. We explain how to effectively use both strategies in this animation. |
| Expect the Unexpected and Manage Disappointment | This animation shows parents how then can help their children manage disappointment when things don’t go as planned by “expecting the unexpected.” |
| Break it Down to Get it Done | Children with executive function challenges can easily get overwhelmed. In this video, an expert gives simple tips for breaking tasks down into steps in order to get things done. |
| Working Towards Goals | Creating and working towards goals is a critical life skill. In this webinar, we discuss how to help your child make goals, understand why that goal is important, and how to create a plan to achieve that goal. |
| Talk Less, Write it Down | In this webinar an expert explains how taking the time to write things down can help your child process their feelings when talking to them either makes it worse or seems to go nowhere. |

**Supplemental Figure 1**

*Example Video*

[*Understanding Executive Functioning*](https://www.youtube.com/watch?v=cRfGJrhPgJk&list=PLFji-AO8E8L7SGVTMLg8Dq3VQ9SNhCiju&index=1&t=18s)


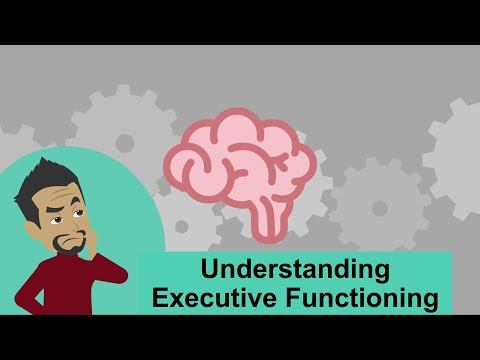


**Supplement C**

**Supplemental Table 2**

*Knowledge Questions and Response Options*

| **Question** | **Answer** |
| --- | --- |
| A child's executive function is: | A) a feeling B) a brain-based function C) a form of communication D) a physical item they should keep with them at all times |
| The most effective ratio of praise to correction is: | A) 1:1 B) 2:1 C) 4:1 D) 5:1 |
| Things that are never negotiable involve: | A) Health, safety, law B) Health, homework, screen time C) Homework, chores, hygiene D) Hygiene, chores, law E) Screen time, health, hygiene |
| Breaking a big task down into small steps can help your child: | A) Be successful when they're having trouble completing a task B) Avoid getting overwhelmed C) Learn to read better D) A and B only E) All of the above |
| All of the following are great ways to compromise, EXCEPT: | A) Take turns B) Flip a coin C) Each gets part D) Pick something new E) A and B F) C and D |
| Thinking of a task as something that your child can't do (instead of won't do) means: | A) They don't have the tools to do this yet B) They aren't able to learn this skill C) You're setting your expectations too low D) You haven't given them a good enough reason to do it E) Letting them get away with not doing as they're told |
| When the unexpected happens and your child is upset, which are helpful things to try first? | A) Say, "You should always expect the unexpected!" B) Live out loud. C) Give a time-out until your child isn't upset anymore. D) Come up with a Plan B. E) Acknowledge your child is feeling disappointed. F) Take away something your child was expecting. |
| The BEST way to begin engaging my child in setting and achieving goals is to: | A) Set just right goals for my child, remind them what to do next, and share my own goals with them.  B) Start with academic goals, keep telling my child what to do next, and reward goal achievement.  C) Start with the goals that already matter to my child, create a written plan with them, and use the language of goals in our daily life  D) Start with just right goals I set for my child, create a written plan with them, and reward goal achievement |
| Your kid's pencil breaks while doing frustrating homework, and they get very upset. Some things you might say are: | A) "Oh, good thing it's just a pencil. That's a little deal."  B) "It's so frustrating when our favorite pencil tip breaks."  C) "Do you have a Plan B pencil?"  D) "It's not a bit deal, we can just sharpen it."  E) "Does this feel like a big deal or a little deal to you?"  F) "I think I have a solution for how to turn this into a little deal." |
| What should you do when your child is very upset? | A) Be a detective. B) Raise your voice to match your child's level of frustration. C) Write a question on a notecard to pass to your child with yes or no responses to check. D) Write down why it's not a big deal. |
| Which of the following are good ways to prevent overload? | A) Do if for your child B) Prepare for triggers C) Remind your child there will be consequences for misbehavior. D) Remind your child that they were able to do this last week. E) Plan for what to do if things go differently than what you expect. F) Make sure your child is not hungry or tired. |
| Which of the following should you try if your child is feeling overwhelmed? | A) Focus on keeping your child safe. B) Isolate the one feeling (sad, angry, upset) that your child is feeling the most. C) Worry about what others are thinking about your parenting. D) Talk them through their feelings to calm them down. E) Tell your child, "It seems like you're at a 5." F) Tell your child you'll take them to a movie if they stop crying. |

**Supplement D**

**Supplemental Table 3**

*Feasibility Question and Response Options*

| Have you used any of the following strategies or words with your child: | - “Can’t not won’t” or executive function to help you or someone else think differently about your child’s behavior - Taking a deep breath - White board - Break it down - Plan A/Plan B - Unstuck - Flexible - Goal - Plan - Big deal/little deal - Expect the unexpected - Compromise - Giving praise and rewards - Preventing overload |
| --- | --- |

**Supplement E**

**Flexibility Interference Scale**

Executive functions help your child follow directions, set goals, stay organized, follow plans, manage transitions and disappointment, and stay calm when faced with a challenge.

**How often do your child's executive function difficulties interfere with everyday family life, on a scale of zero to ten, with zero being never and ten being more than once a day?**

**When your child has executive function difficulties, how much do they disrupt everyday family life, on a scale of zero to ten, with zero being not at all and ten being the most disruptive?**

**Supplement F**

**Supplemental Table 4**

| Video Title | Percent Missing Review |
| --- | --- |
| Understanding Executive Functioning | 6.86% |
| Motivation: How Everyone in Your Family Can Get More of What They Want | 6.86% |
| Compromising So Everyone Wins | 10.78% |
| Is it a "Can't" or a "Won't"? | 10.78% |
| Managing Intense Feelings | 17.65% |
| Preventing Overload | 17.65% |
| What to do When What We Want Seems Impossible? | 7.84% |
| Plan A/Plan B & Big Deal/Little Deal | 17.65% |
| Expect the Unexpected and Manage Disappointment | 21.57% |
| Break it Down to Get it Done | 8.82% |
| Working Towards Goals | 21.57% |
| Talk Less, Write it Down | 19.61% |

**Supplement G**

**Supplemental Figure 2**

*Mean Efficacy Rating by Video Group*

*Note*
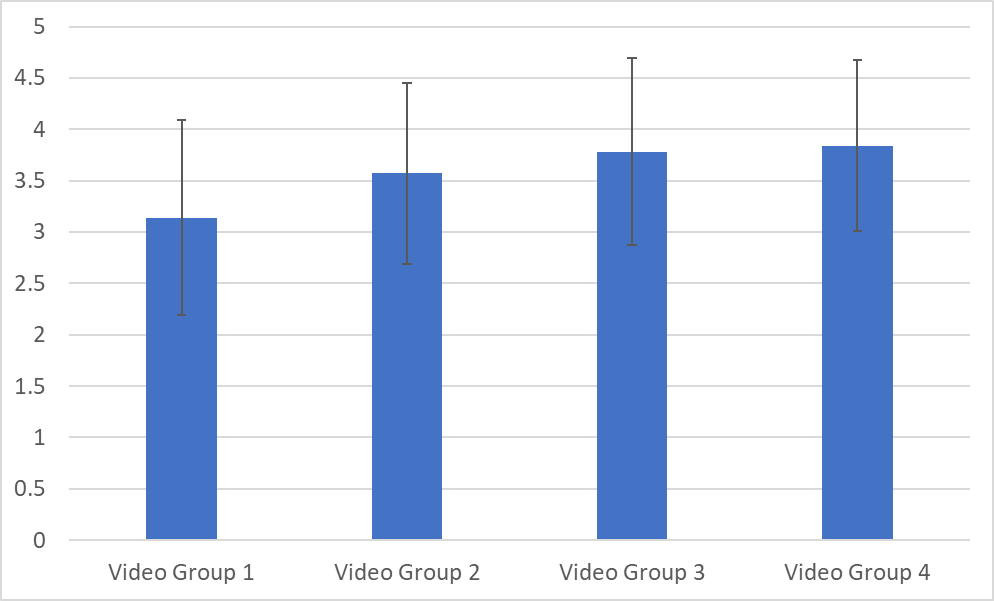
*Note.* This figure shows the mean for the 63 caregivers who responded to the efficacy question for every video group.

Caregivers’ views of their child’s EF difficulties significantly changed between each video group, *F*(3, 186) = 28.83, p < .001, *η2* = 0.09. A post hoc Tukey test revealed significant differences when comparing video group 1 to each of the other groups (video groups 2, 3, and 4), but other comparisons did not significantly differ (group 2 compared with group 3 and group 4, for example). See Supplemental Table 5 below for the full Tukey HSD results. These results indicate that video group 1 may have a larger impact on changing caregivers’ views. Furthermore, we could not randomly assign caregivers to receive videos and/or video groups in different orders so it may be possible that the first video group’s introduction to EF for those who may not have understood the concept before played a large role in changing how caregivers viewed their child’s EF difficulties. Regardless, we still found that views significantly changed across the video groups, but more investigation is needed to see if certain videos contribute more to changing caregivers’ views than others.

**Supplemental Table 5**

*Caregiver Efficacy Post Hoc Tukey HSD Results*

| Video group | | Estimate | 95% confidence  interval for mean | | Adjusted *p*-value |
| --- | --- | --- | --- | --- | --- |
| Lower bound | Upper bound |
| 1 | 2 | 0.43 | 0.02 | 0.84 | <0.05 |
| 1 | 3 | 0.64 | 0.23 | 1.05 | <0.001 |
| 1 | 4 | 0.7 | 0.29 | 1.11 | <0.001 |
| 2 | 3 | 0.21 | -0.2 | 0.62 | >0.05 |
| 2 | 4 | 0.27 | -0.14 | 0.68 | >0.05 |
| 3 | 4 | 0.06 | -0.35 | 0.47 | >0.05 |

**Supplement H**

**Supplemental Table 6**

*Caregiver Ratings of Helpfulness by Video*

| Video | *M* | *SE* |
| --- | --- | --- |
| Understanding Executive Functioning  (n = 95) | 4.08 | 0.93 |
| Motivation: Being Flexible Gives You Choices  (n = 95) | 4.13 | 0.96 |
| What to Do When What We Want Seems Impossible (n = 92) | 3.82 | 0.98 |
| Break it Down  (n = 91) | 3.89 | 1 |
| Compromising So Everyone Wins  (n = 90) | 3.94 | 0.92 |
| Is it a "Can't" or a "Won't?"  (n = 91) | 4.03 | 0.95 |
| Expect the Unexpected & Manage Disappointment  (n = 80) | 4.06 | 0.9 |
| Goal, Why, Plan  (n = 80) | 4.21 | 0.84 |
| Plan A/Plan B & Big Deal/Little Deal  (n = 79) | 4.15 | 0.83 |
| Talk Less/Write it Down  (n = 85) | 4.15 | 0.87 |
| Preventing Overload  (n = 84) | 3.75 | 1.03 |
| Managing Intense Feelings  (n = 82) | 3.83 | 0.98 |

**Supplemental Table 7**

*Strategies Endorsed by Caregivers by Timepoint*

|  | **Percent of Caregivers Who Endorsed Use of Skill** | | |
| --- | --- | --- | --- |
| **Strategies** | **Video Group 2 (*n* = 93)** | **Video Group 3 (*n* = 87)** | **Video Group 4 (*n* = 81)** |
| **“Can't not won't" or executive function to help you or someone else think differently about your child's behavior** | 18.6% | 27.5% | 33.3% |
| **Taking a deep breath** | 72.5% | 69.6% | 64.7% |
| **White board** | 22.5% | 15.7% | 0.0% |
| **Break it down** | 49.0% | 45.1% | 43.1% |
| **Plan A/Plan B** | 27.5% | 44.1% | 45.1% |
| **Unstuck** | 5.9% | 11.8% | 0.0% |
| **Flexible** | 45.1% | 49.0% | 52.0% |
| **Goal** | 24.5% | 31.4% | 37.3% |
| **Plan** | 36.3% | 38.2% | 45.1% |
| **Big Deal/Little Deal** | 40.2% | 50.0% | 50.0% |
| **Expect the Unexpected** | 20.6% | 37.3% | 43.1% |
| **Compromise** | 52.0% | 56.9% | 51.0% |
| **Giving praise and rewards** | 80.4% | 66.7% | 57.% |
| **Preventing Overload** | 36.3% | 47.1% | 49.0% |

**Supplemental Table 8**

*Average Number of Strategies Reported by Caregivers at Multiple Timepoints*

|  | **Average Number of Strategies Reporteda** |
| --- | --- |
| **Video Group 2** | 6 |
| **Video Group 3** | 7 |
| **Video Group 4** | 7 |

1. Average number of strategies rounded to the nearest whole number, for ease of interpretation.
